# Supplementary material for: Quantitative Analysis of the Seminal Plasma Proteome in Secondary Hypogonadism
Source: PubMed Central journal article supplement (PMC6947469; doi:10.3390/jcm8122128), 2019-12-03

|                      | Hypogonadic Patients (N=7)        | Range values   |
|----------------------|-----------------------------------|----------------|
| Age                  | 41.35 ± 12.25                     |                |
| Testosterone (T)     | 1.72 ± 0.76                       | 2.5-8.4 ng/ml  |
| Estradiol (E2)       | 24.06 ± 3.44                      | 15-44 pg/ml    |
| SHBG                 | 18.68 ± 5.31                      | 16-80 nmol/L   |
| FSH                  | 1.63 ± 0.94                       | 1.0-8.0 mU/ml  |
| LH                   | 0.84 ± 0.35                       | 2.5-10.0 mU/ml |
| Seminal volume       | 1.48 ± 0.98 ml                    |                |
| Sperm concentration  | 3.54 ± 4.54 × 10 <sup>6</sup> /ml |                |
| Total sperm motility | 9.36 ± 11.32 %                    |                |
| Normal morphology    | 3.15 ± 3.07 %                     |                |

**Supplementary Table 1.** Clinical and hormonal parameters of the population of 7 additional hypogonadic patients furtherly added in western blot analysis.

**Supplementary Figure 1.** Picture of all gels after enhanced chemiluminescence, all pictures of membranes after red ponceau staining and western blot membrane with detected bands.

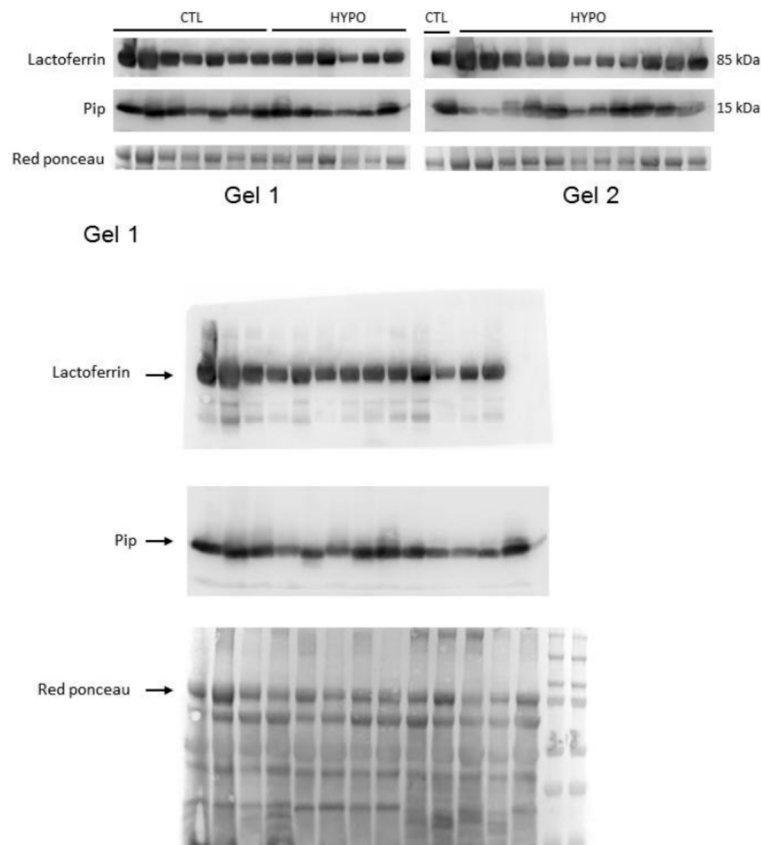

### Gel 2

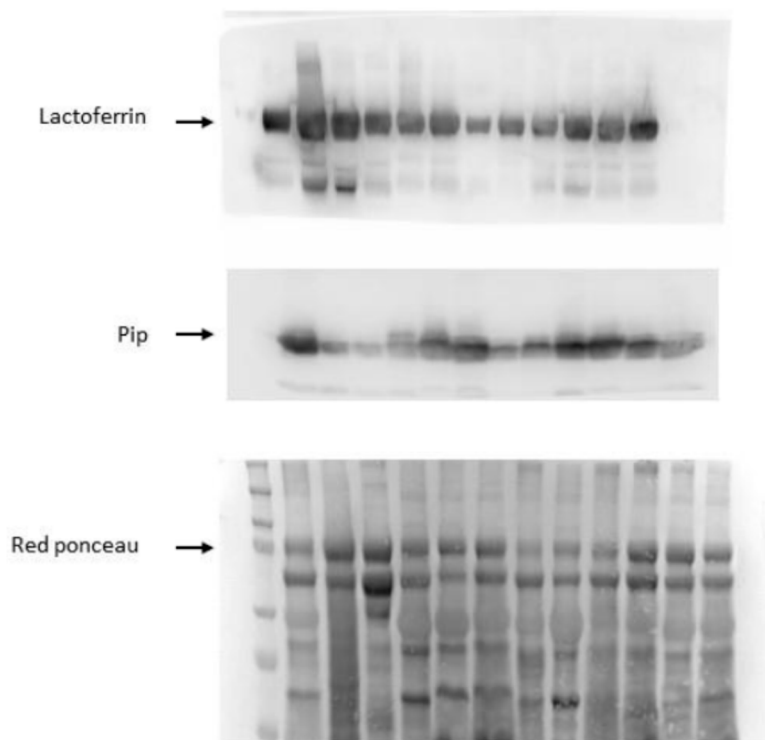

**Supplementary Figure 2.** Quantification analysis of western blot

Quantification WB Figure 1

| red ponceau |        |          |        |       |
|-------------|--------|----------|--------|-------|
| Number      | Vol. % | Volume   | Height | Area  |
| ctl         | 0.793  | 3.62E+08 | 42740  | 15750 |
| ctl         | 1.313  | 6.01E+08 | 49170  | 18270 |
| ctl         | 0.98   | 4.48E+08 | 38200  | 17514 |
| ctl         | 1.015  | 4.64E+08 | 34648  | 18522 |
| ctl         | 1.049  | 4.8E+08  | 39229  | 17010 |
| ctl         | 1.019  | 4.66E+08 | 34248  | 18774 |
| ctl         | 1      | 4.57E+08 | 38098  | 16632 |
| hypo        | 1.119  | 5.12E+08 | 37145  | 19404 |
| hypo        | 1.004  | 4.59E+08 | 40029  | 16506 |
| hypo        | 1.224  | 5.6E+08  | 46112  | 18396 |
| hypo        | 0.935  | 4.28E+08 | 30544  | 19530 |
| hypo        | 0.681  | 3.11E+08 | 29776  | 16632 |
| hypo        | 0.988  | 4.52E+08 | 36782  | 19908 |

|       |
|-------|
| 0.793 |
| 1.313 |
| 0.98  |
| 1.015 |
| 1.049 |
| 1.019 |
| 1     |
| 1.119 |
| 1.004 |
| 1.224 |
| 0.935 |
| 0.681 |
| 0.988 |
| 1.744 |
| 1.784 |
| 1.535 |
| 1.599 |
| 1.734 |
| 1.186 |
| 1.267 |
| 1.359 |
| 1.757 |
| 1.472 |
| 1.388 |

| Lactoferrin |        |          |        |      |
|-------------|--------|----------|--------|------|
| Number      | Vol. % | Volume   | Height | Area |
| ctl         | 1.248  | 1.1E+08  | 31563  | 6241 |
| ctl         | 1.195  | 1.06E+08 | 22802  | 6715 |
| ctl         | 1.082  | 95741629 | 24224  | 6715 |
| ctl         | 1.003  | 88678987 | 26280  | 6715 |
| ctl         | 1.158  | 1.02E+08 | 30653  | 5925 |
| ctl         | 0.976  | 86358556 | 25079  | 6873 |
| ctl         | 1      | 88456183 | 26269  | 6557 |
| hypo        | 1.132  | 1E+08    | 26410  | 7031 |
| hypo        | 1.031  | 91230925 | 27439  | 6478 |
| hypo        | 1.301  | 1.15E+08 | 38866  | 6320 |
| hypo        | 0.699  | 61860109 | 25049  | 6399 |
| hypo        | 0.983  | 86981185 | 31127  | 5925 |
| hypo        | 1.19   | 1.05E+08 | 31026  | 7189 |

|       |
|-------|
| 1.248 |
| 1.195 |
| 1.082 |
| 1.003 |
| 1.158 |
| 0.976 |
| 1     |
| 1.132 |
| 1.031 |
| 1.301 |
| 0.699 |
| 0.983 |
| 1.19  |
| 0.971 |
| 0.951 |
| 0.82  |
| 0.779 |
| 0.934 |
| 0.533 |
| 0.689 |
| 0.602 |
| 0.926 |
| 0.729 |
| 1.018 |

| Lactoferrin/red ponceau | M     | sd       | T        |
|-------------------------|-------|----------|----------|
|                         | 1.57  | 1.091124 | 0.224616 |
|                         | 0.91  |          | **       |
|                         | 1.10  |          |          |
|                         | 0.99  |          |          |
|                         | 1.10  |          |          |
|                         | 0.96  |          |          |
|                         | 1.00  |          |          |
|                         | 1.01  | 0.725805 | 0.306924 |
|                         | 1.03  |          |          |
|                         | 1.06  |          |          |
|                         | 0.75  |          |          |
|                         | 1.44  |          |          |
|                         | 1.20  |          |          |
|                         | 0.56  |          |          |
|                         | 0.53  |          |          |
|                         | 0.53  |          |          |
|                         | 0.49  |          |          |
|                         | 0.54  |          |          |
|                         | 0.45  |          |          |
|                         | 0.54  |          |          |
|                         | 0.602 |          |          |
|                         | 0.53  |          |          |
|                         | 0.50  |          |          |
|                         | 0.73  |          |          |

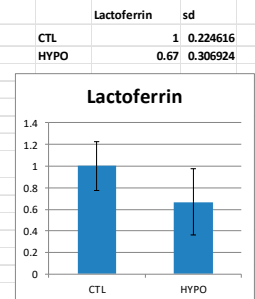

| pip    |        |          |        |       |
|--------|--------|----------|--------|-------|
| Number | Vol. % | Volume   | Height | Area  |
| No 1   | 1.262  | 2.73E+08 | 50915  | 16714 |
| No 2   | 1.345  | 2.91E+08 | 47547  | 13426 |
| No 3   | 1.04   | 2.25E+08 | 43872  | 13152 |
| No 4   | 0.686  | 1.48E+08 | 32658  | 12467 |
| No 5   | 0.915  | 1.98E+08 | 41238  | 12330 |
| No 6   | 0.819  | 1.77E+08 | 35675  | 12741 |
| No 7   | 1      | 2.16E+08 | 45424  | 11645 |
| No 8   | 1.27   | 2.75E+08 | 48268  | 13289 |
| No 9   | 0.957  | 2.07E+08 | 46356  | 12467 |
| No 10  | 0.657  | 1.42E+08 | 38891  | 11782 |
| No 11  | 0.602  | 1.3E+08  | 34104  | 13152 |
| No 12  | 0.698  | 1.51E+08 | 41207  | 12467 |
| No 13  | 1.298  | 2.81E+08 | 51267  | 14111 |

|       |
|-------|
| 1.262 |
| 1.345 |
| 1.04  |
| 0.686 |
| 0.915 |
| 0.819 |
| 1     |
| 1.27  |
| 1.27  |
| 0.957 |
| 0.657 |
| 0.602 |
| 0.698 |
| 1.298 |
| 0.35  |
| 0.202 |
| 0.387 |
| 0.696 |
| 0.861 |
| 0.337 |
| 0.486 |
| 0.81  |
| 0.849 |
| 0.668 |
| 0.51  |

| pip/red ponceau | M    | sd       | T        |
|-----------------|------|----------|----------|
|                 | 1.59 | 1.004125 | 0.292664 |
|                 | 1.02 |          | **       |
|                 | 1.06 |          |          |
|                 | 0.68 |          |          |
|                 | 0.87 |          |          |
|                 | 0.80 |          |          |
|                 | 1.00 |          |          |
|                 | 1.13 | 0.569031 | 0.342924 |
|                 | 0.95 |          |          |
|                 | 0.54 |          |          |
|                 | 0.64 |          |          |
|                 | 1.02 |          |          |
|                 | 1.31 |          |          |
|                 | 0.20 |          |          |
|                 | 0.11 |          |          |
|                 | 0.25 |          |          |
|                 | 0.44 |          |          |
|                 | 0.50 |          |          |
|                 | 0.28 |          |          |
|                 | 0.38 |          |          |
|                 | 0.60 |          |          |
|                 | 0.48 |          |          |
|                 | 0.45 |          |          |
|                 | 0.37 |          |          |

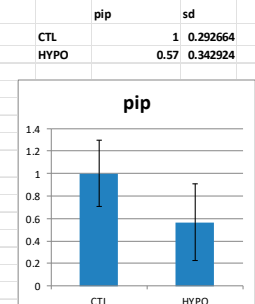

| pip    |        |          |        |       |
|--------|--------|----------|--------|-------|
| Number | Vol. % | Volume   | Height | Area  |
| No 1   | 1      | 3.04E+08 | 45702  | 15892 |
| No 2   | 0.35   | 1.07E+08 | 29497  | 11782 |
| No 3   | 0.202  | 61612890 | 16378  | 11508 |
| No 4   | 0.387  | 1.18E+08 | 21001  | 12878 |
| No 5   | 0.696  | 2.12E+08 | 35287  | 12878 |
| No 6   | 0.861  | 2.62E+08 | 42588  | 14111 |
| No 7   | 0.337  | 1.03E+08 | 28632  | 10686 |
| No 8   | 0.486  | 1.48E+08 | 35763  | 12330 |
| No 9   | 0.81   | 2.46E+08 | 46174  | 12604 |
| No 10  | 0.849  | 2.58E+08 | 42997  | 13426 |
| No 11  | 0.668  | 2.03E+08 | 38490  | 13426 |
| No 12  | 0.51   | 1.55E+08 | 25508  | 16440 |

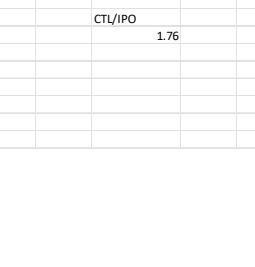

Supplement: jcm-08-02128-s001.pdf [file jcm-08-02128-s001.pdf]
